# Supplementary material for: Anisotropic solid-state PLA foaming templated by crystal phase pre-oriented with 3D printing: cell supporting structures with directional capillary transfer function
Source: Royal Society of Chemistry journal article supplement (doi:10.1039/d1tb02133h), 2022-01-01
Supplement: d1tb02133h1.pdf [file d1tb02133h1.pdf]

## Supporting information

# **“Anisotropic solid-state PLA foaming templated by crystal phase pre-oriented with 3D printing: Cell supporting structures with directional capillary transfer”**

Petr Lepcio<sup>1\*</sup>, Juraj Svatík<sup>1</sup>, Ema Režnáková<sup>2</sup>, Daniel Zicha<sup>1,3</sup>, Alan J.

Lesser<sup>4</sup>, František Ondreáš<sup>1,5</sup>

<sup>1</sup>Central European Institute of Technology, Brno University of Technology, Purkyňova 656/123,  
612 00 Brno, Czech Republic

<sup>2</sup>Faculty of Chemistry, Brno University of Technology, Purkyňova 118, 612 00 Brno, Czech Republic

<sup>3</sup>Faculty of Mechanical Engineering, Brno University of Technology, Technická 2896/2, 616 69 Brno,  
Czech Republic

<sup>4</sup>University of Massachusetts Amherst, 120 Governors Drive, Amherst, MA 01003, USA

<sup>5</sup>Contipro a.s., Dolní Dobrouč 401, 561 02 Dolní Dobrouč, Czech Republic

\*petr.lepcio@ceitec.vutbr.cz

# 1. FTIR estimation of the L and D content in PLA

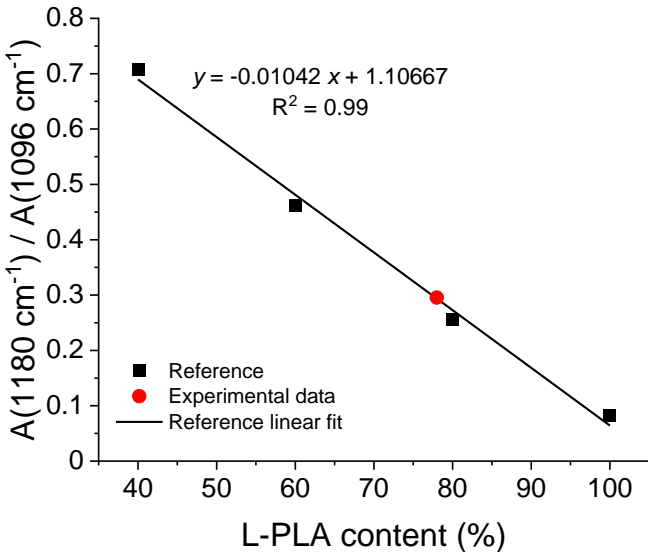

Fig. S1: Plot of the relative ratio of FTIR peaks at 1180 and 1096 cm<sup>-1</sup> in the fingerprint region from the ref. 32 fitted with linear curve and used for the estimation of the D and L-PLA content in the PLA used throughout this study.

## 2. Wide angle X-ray scattering (WAXS)

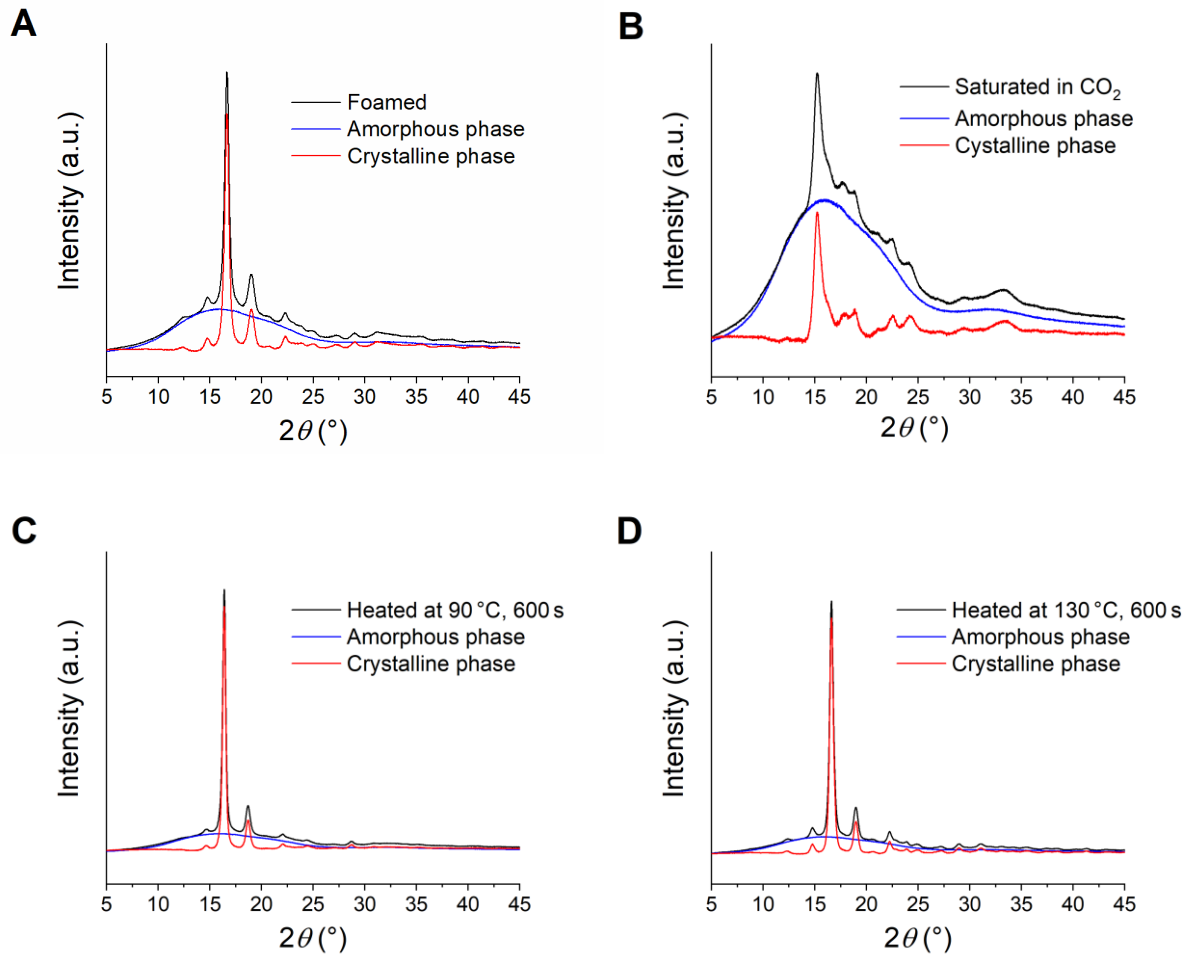

Fig. S2: WAXS diffractograms, amorphous reference, and signal of the crystalline phase for samples (A) foamed, (B) saturated with CO<sub>2</sub>, and (C) heated at 90 °C and (D) at 130 °C.

Table S1: Overview of WAXS peaks and crystallinity.

| Sample                       | $w_c$ , WAXS (%) |           | WAXS peaks |           |         |           |           |         |           |           |       |
|------------------------------|------------------|-----------|------------|-----------|---------|-----------|-----------|---------|-----------|-----------|-------|
|                              |                  |           | $2\theta$  | $d_{hkl}$ | $hkl$   | $2\theta$ | $d_{hkl}$ | $hkl$   | $2\theta$ | $d_{hkl}$ | $hkl$ |
| Saturated in CO <sub>2</sub> | 22.3             | $2\theta$ | 15.22°     | 16.03°    | 17.60°  | 18.77°    | 22.56°    | 24.00°  | 21.11°    |           |       |
|                              |                  | $d_{hkl}$ | 0.582      | 0.552     | 0.504   | 0.472     | 0.394     | 0.370   | 0.421     |           |       |
|                              |                  | $hkl$     | 110        | Unclear   | Unclear | 200       | 015       | 016     | 204       |           |       |
| Heated at 90 °C              | 50.2             | $2\theta$ | 14.65°     | 16.40°    | 18.72°  | 22.07°    | 24.46°    |         |           |           |       |
|                              |                  | $d_{hkl}$ | 0.604      | 0.540     | 0.474   | 0.402     | 0.364     |         |           |           |       |
|                              |                  | $hkl$     | 011        | 110/200   | 203     | 015       | Unclear   |         |           |           |       |
| Heated at 130 °C             | 44.8             | $2\theta$ | 12.34°     | 14.78°    | 16.61°  | 18.99°    | 22.23°    | 23.86°  | 24.94°    |           |       |
|                              |                  | $d_{hkl}$ | 0.717      | 0.599     | 0.533   | 0.467     | 0.400     | 0.373   | 0.357     |           |       |
|                              |                  | $hkl$     | 004/103    | 011       | 110/200 | 203       | 015       | Unclear | 206       |           |       |
| Foamed                       | 43.5             | $2\theta$ | 14.80°     | 16.65°    | 19.01°  | 22.28°    |           |         |           |           |       |
|                              |                  | $d_{hkl}$ | 0.598      | 0.532     | 0.466   | 0.399     |           |         |           |           |       |
|                              |                  | $hkl$     | 011        | 110/200   | 203     | 015       |           |         |           |           |       |

## 2. Differential Scanning Calorimetry (DSC)

Table S2: Overview of the temperatures ( $T$ ) and enthalpies ( $\Delta H$ ) established from the DSC curves at a heating rate of  $10 \text{ K}\cdot\text{min}^{-1}$ . The subscripts  $cc1$ ,  $cc2$ ,  $m$ , and  $c$  relate to the first and second peak of cold crystallization, ultimate melting, and the actual crystallinity, respectively. The  $w_{c, \text{DSC}}$  and  $w_{c, \text{XRD}}$  represents the crystallinity obtained by DSC and WAXS, respectively.

\*Related to  $\Delta H_{0,\alpha\text{-PLA}} = 68.2 \text{ J}\cdot\text{g}^{-1}$ .

|            | $T_g$<br>(°C) | $\Delta H_{cc1}$<br>( $\text{J}\cdot\text{g}^{-1}$ ) | $T_{cc}$<br>(°C) | $\Delta H_{cc2}$<br>( $\text{J}\cdot\text{g}^{-1}$ ) | $T_{rc}$<br>(°C) | $\Delta H_m$<br>( $\text{J}\cdot\text{g}^{-1}$ ) | $T_m$<br>(°C) | $\Delta H_c$<br>( $\text{J}\cdot\text{g}^{-1}$ ) | $w_{c, \text{DSC}}$<br>(%) | $w_{c, \text{XRD}}$<br>(%) |
|------------|---------------|------------------------------------------------------|------------------|------------------------------------------------------|------------------|--------------------------------------------------|---------------|--------------------------------------------------|----------------------------|----------------------------|
| 3D printed | 62,2          | -33.6                                                | 98.4             | -2.0                                                 | 154.8            | 36.4                                             | 168.8         | 0.8                                              | 0.9                        | -                          |
| Saturated  | 37,5          | -6.4                                                 | 128.3            | -                                                    | -                | 32.4                                             | 168.8         | 26.0                                             | 27.9                       | 22.3                       |
| 90°C       | 64.2          | -1.7                                                 | 76.0             | -0.2                                                 | 153.1            | 37.4                                             | 167.3         | 35.9                                             | 56.6*                      | 50.2                       |
| 130°C      | 63.2          | -0.1                                                 | 76.1             | -                                                    | -                | 42.3                                             | 168.6         | 42.2                                             | 45.4                       | 44.8                       |
| Foamed     | 63.6          | -                                                    | -                | -                                                    | -                | 35.9                                             | 168.4         | 35.9                                             | 38.6                       | 38.2                       |

Table S3: Overview of the melting temperatures ( $T_m$ ) established from the DSC curves at a heating rate of  $1 \text{ K}\cdot\text{min}^{-1}$ .

|            | $T_{m,1}$<br>(°C) | $T_{m,2}$<br>( $\text{J}\cdot\text{g}^{-1}$ ) |
|------------|-------------------|-----------------------------------------------|
| 3D printed | 165.4             | 170.8                                         |
| Saturated  | 170.2             | -                                             |
| 90°C       | 169.6             | -                                             |
| 130°C      | 165.5             | 171.2                                         |
| Foamed     | 169.9             | -                                             |

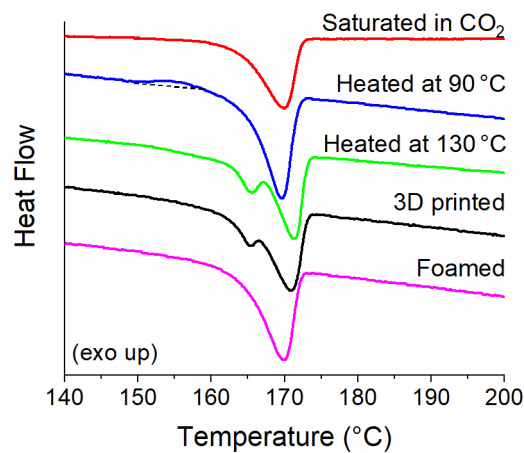

Fig. S3: DSC curves of the melting for 3D printed (black),  $\text{CO}_2$  saturated (red), and heated at 90 (blue) and 130 °C (green) samples recorded at a heating rate of  $1 \text{ K}\cdot\text{min}^{-1}$ .

### 3. Additional SEM images

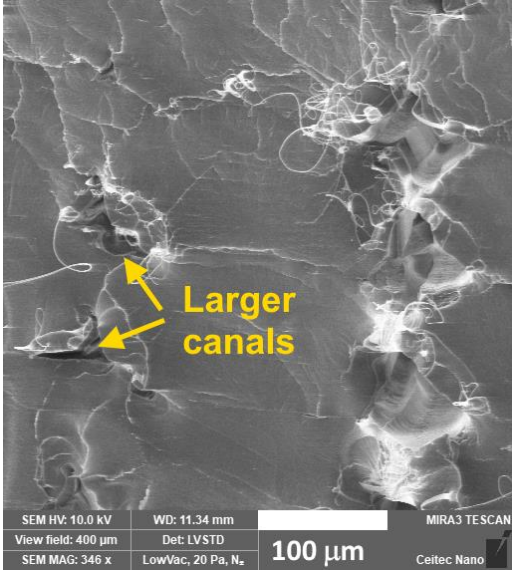

Fig. S4: SEM image detail of the larger canals in the cross-section direction.

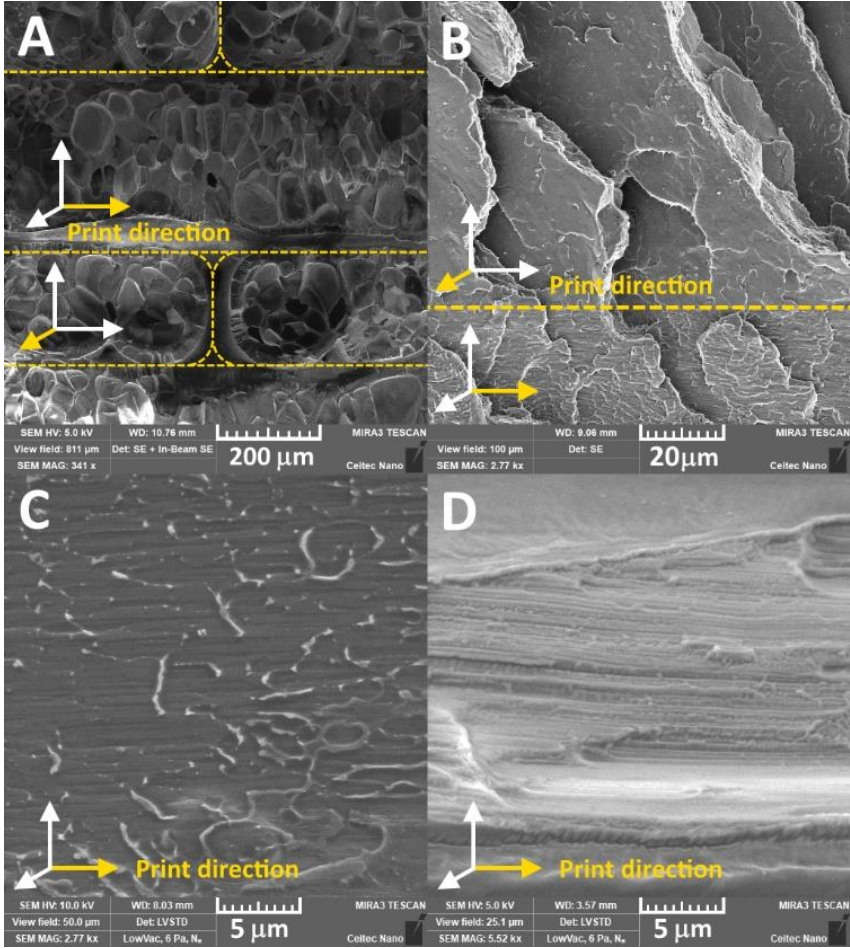

Fig. S5: SEM images of (A) 3D printed PMMA foamed at 130 °C, (B) 3D printed PLA (C) 3D printed PLA heated at 130 °C, and (D) PLA foamed without external confinement. The yellow arrow and dashed line indicate the print direction and print layer boundaries, respectively.

## 4. Stress-strain curves

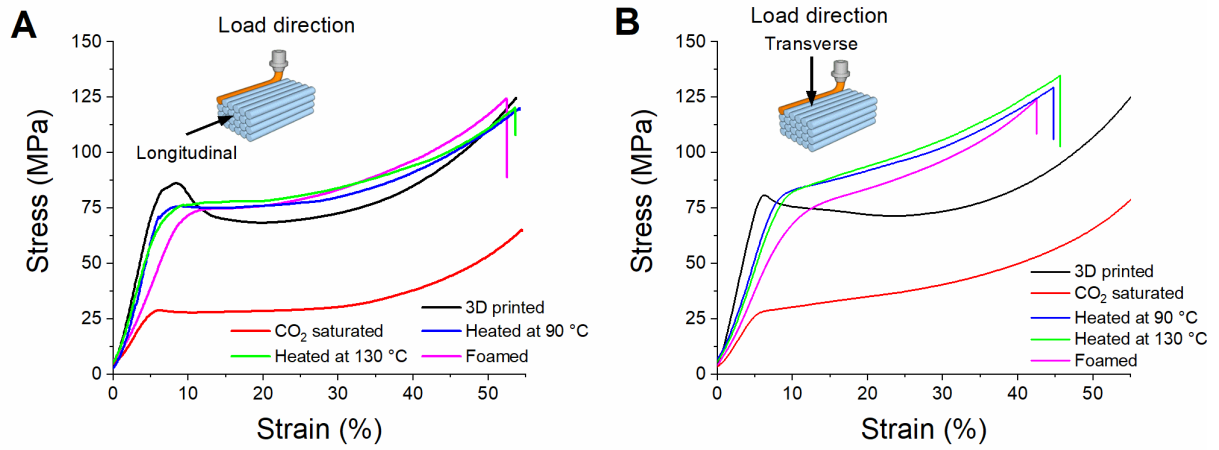

Fig. S6: Representative stress-strain curves under compression load in (A) longitudinal and (B) transverse direction respective to the print orientation.
